# Supplementary material for: Systematically programmed adaptive evolution reveals potential role of carbon and nitrogen pathways during lipid accumulation in Chlamydomonas reinhardtii
Source: PubMed Central journal article supplement (PMC4174265; doi:10.1186/s13068-014-0117-7), 2014-09-06
Supplement: 13068_2014_117_MOESM2_ESM.pdf [file 13068_2014_117_MOESM2_ESM.pdf]

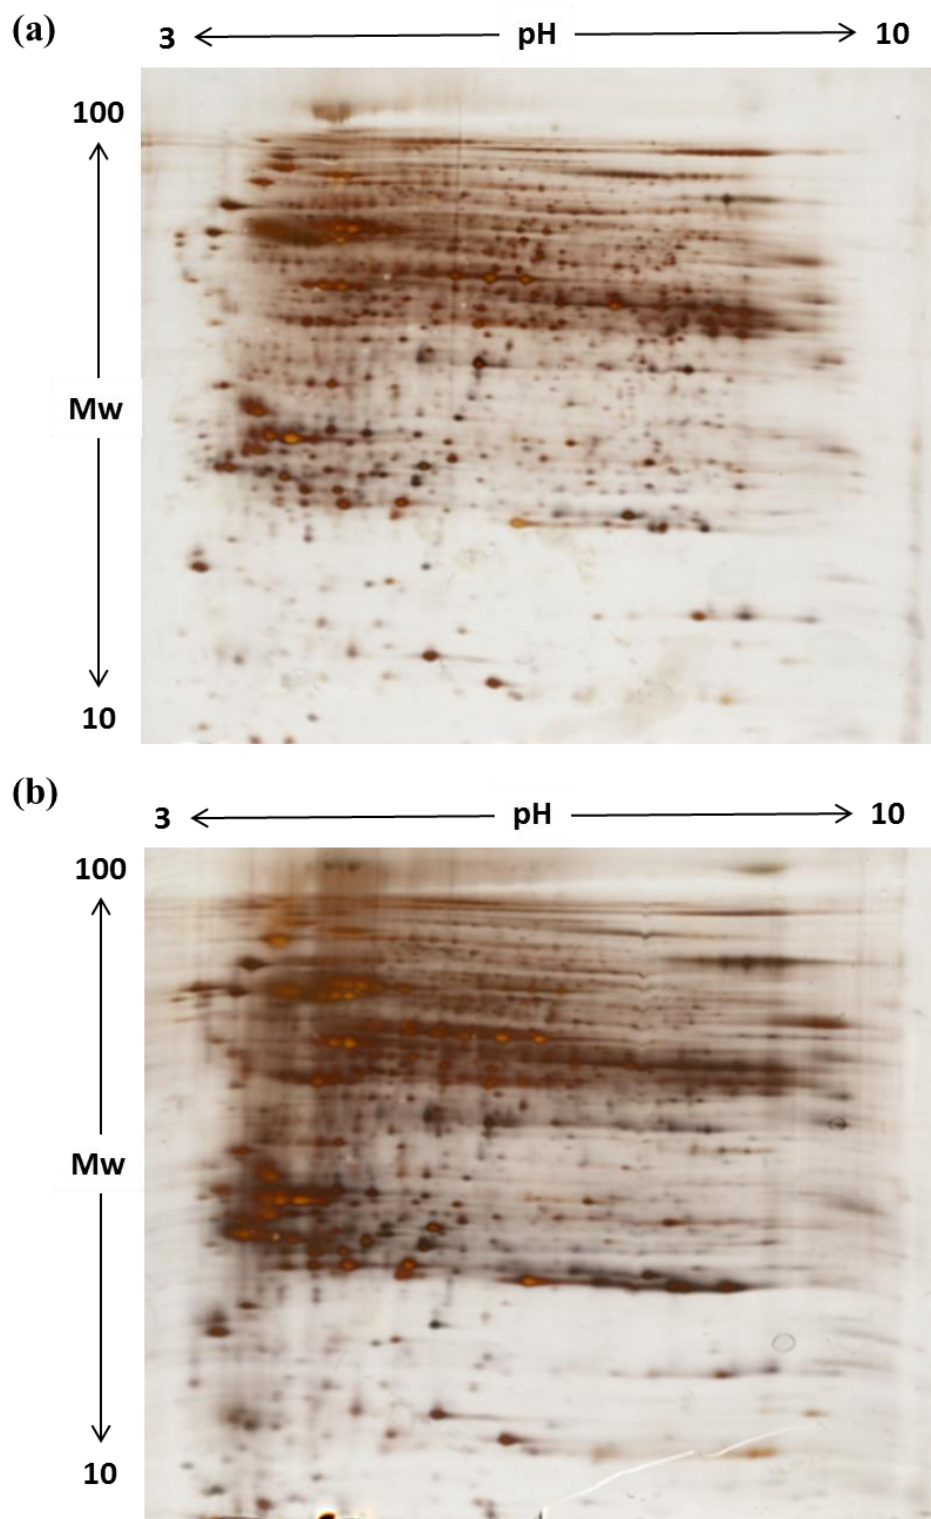

**Figure S2.** Two-dimensional gels stained with silver staining (pH 3-10) for *sta6-1*. Gels showing protein expression profiles of *sta6-1* between different timing points (a) day 14 and (b) day 27, and (c) day 43 during adaptive evolution.

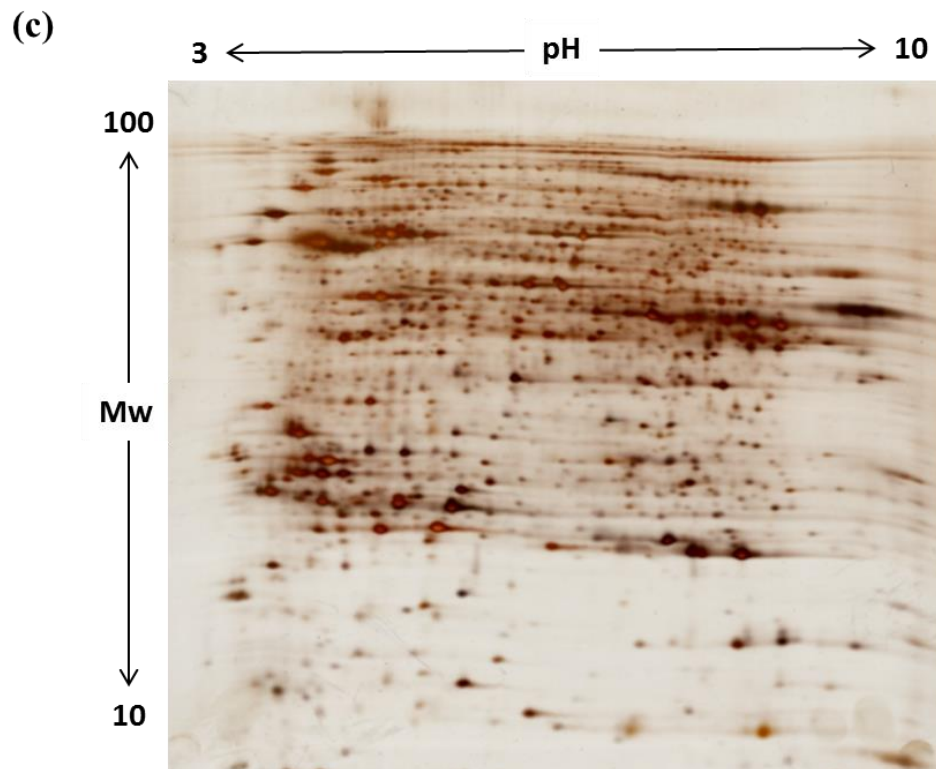

**Figure S2.** (*continued*) Two-dimensional gels stained with silver staining (pH 3-10) for *sta6-1*. Gels showing protein expression profiles of *sta6-1* between different timing points (a) day 14 and (b) day 27, and (c) day 43 during adaptive evolution.
