# Supplementary material for: Systematically programmed adaptive evolution reveals potential role of carbon and nitrogen pathways during lipid accumulation in Chlamydomonas reinhardtii
Source: PubMed Central journal article supplement (PMC4174265; doi:10.1186/s13068-014-0117-7), 2014-09-06
Supplement: 13068_2014_117_MOESM5_ESM.pdf [file 13068_2014_117_MOESM5_ESM.pdf]

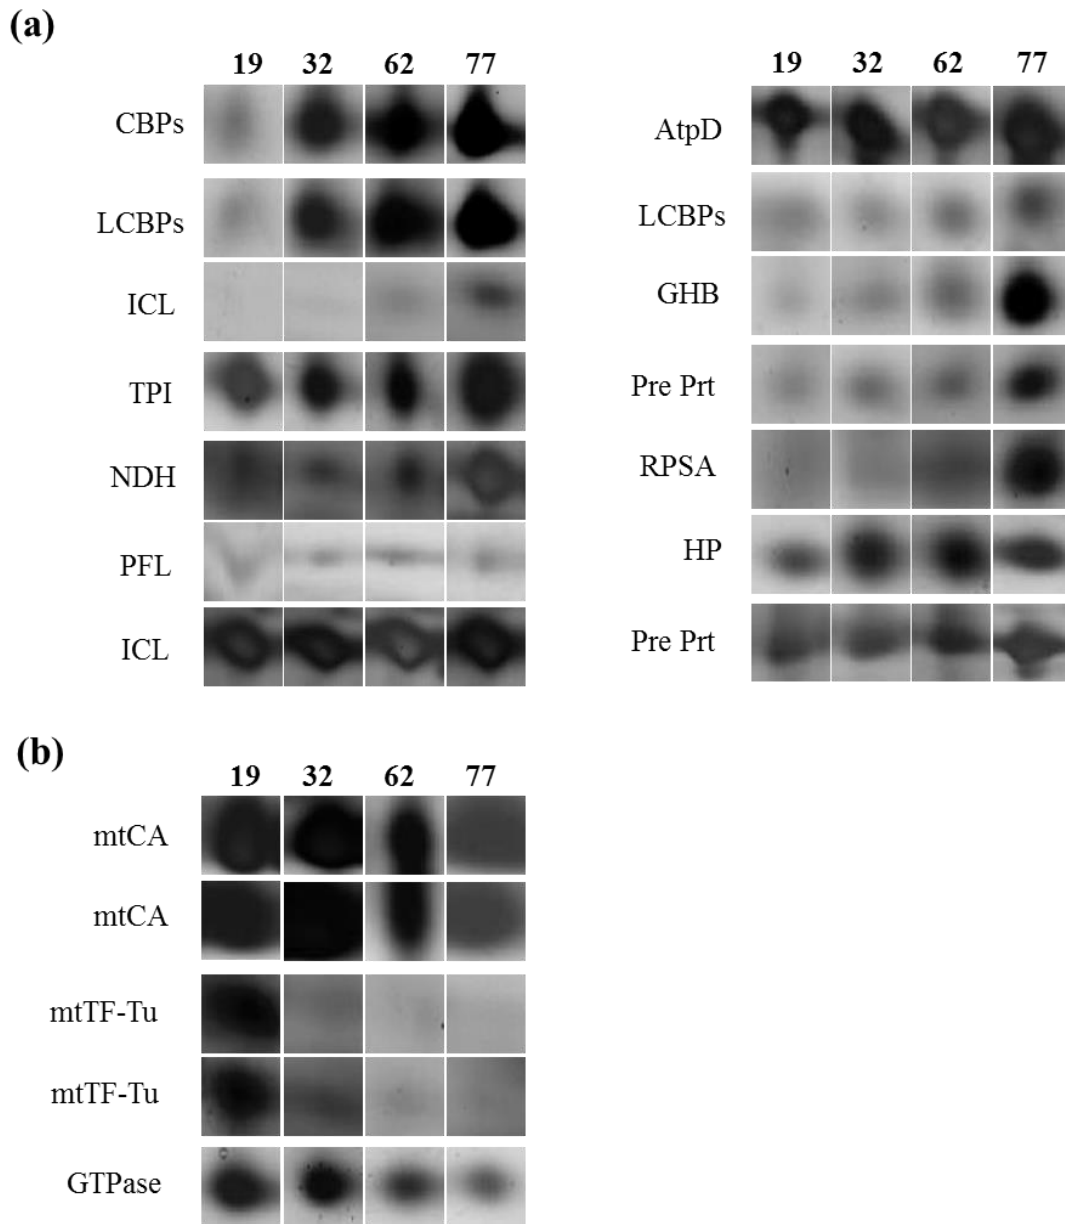

**Figure S5.** Proteome profiles of CC124 during adaptive evolution period. (a) The zoom-in image of protein spots which were (a) up-regulated or (b) down-regulated during adaptive evolution period. The abbreviations for the enzymes included are as follows: CBP, Chlorophyll-ab-binding protein of LHCII type I, chloroplast precursor; LCBP, Light-harvesting complex II chlorophyll a-b binding protein M3; ICL, Isocitrate lyase; TPI, Triose phosphate isomerase; NDH, NADP-Malate dehydrogenase; PFL, Pyruvate-formate lyase; AtpD, ATP synthase CF1 beta subunit; GHB, Gamma-hydroxybutyrate dehydrogenase; Pre Prt, Predicted protein; RPSA, Ribosomal protein Sa, component of cytosolic 80S ribosome and 40S small subunit; HP, Hypothetical protein; mtCA, Mitochondrial carbonic anhydrase  $\beta$  type; mtTF-Tu, Mitochondrial translation factor Tu; GTPase, Ran-like small GTPase.
